# Supplementary material for: Current and emerging treatment strategies for children with progressive chiasmatic-hypothalamic glioma diagnosed as infants: a web-based survey
Source: PubMed Central journal article supplement (PMC5754463; doi:10.1007/s11060-017-2630-6), 2017-10-25
Supplement: 11060_2017_2630_MOESM1_ESM.pdf [file 11060_2017_2630_MOESM1_ESM.pdf]

|                 |                            |                  |                  |
|-----------------|----------------------------|------------------|------------------|
| HELP            | STEP 1. SETTINGS           | STEP 2. ELEMENTS | STEP 3. OVERVIEW |
| STEP 4. PREVIEW | STEP 5. ADDITIONAL OPTIONS | STEP 6. PUBLISH  |                  |

# STEP 4. Preview

Tip: Click on a text to edit.

Add an element

Seite: 1

|                   |          |          |          |
|-------------------|----------|----------|----------|
| Fortschritt_Basis | Fortgang | kopieren | anpassen |
|-------------------|----------|----------|----------|

[Fortgangsbalken]

|     |  |
|-----|--|
| 11% |  |
|-----|--|

|                                    |             |          |          |
|------------------------------------|-------------|----------|----------|
| TREATMENT_OF_PROGRESSIVE_OPG_<1_yr | Überschrift | kopieren | anpassen |
|------------------------------------|-------------|----------|----------|

## Treatment of Progressive Optic Pathway Glioma in Infants

|                                      |              |          |          |
|--------------------------------------|--------------|----------|----------|
| Einleitung_[KLICKEN,_UM_ ANZUPASSEN] | Zwischentext | kopieren | anpassen |
|--------------------------------------|--------------|----------|----------|

Sporadic infant chiasmatic / hypothalamic glioma (ICHG) has to be considered as a chronic disease and almost invariably will necessitate subsequent treatment episodes at progression (i.e. second-line or third-line treatment).

The dismal prognosis of ICHG made us design a specific questionnaire for this disease. It shall help to characterise current treatment decisions for progressive infant chiasmatic / hypothalamic glioma (ICHG), i.e. children diagnosed during the first year of life.

All questions below therefore ONLY concern INFANTS with chiasmatic / hypothalamic glioma (i.e. DIAGNOSED during the first year of life).

|         |              |          |          |
|---------|--------------|----------|----------|
| authors | Zwischentext | kopieren | anpassen |
|---------|--------------|----------|----------|

This survey has been initiated by Amedeo A. Azizi and A.Y.N. Schouten - van Meeteren on behalf of the

SIOP-E Low Grade Glioma working group.

Neue Seite | kopieren | anpassen

Next

## Seite: 2 | PAGE\_2

previous

22%

LIST\_of\_QUESTIONS | Static Text | copy | adjust

QUESTIONS to following topics will be asked.

- Progression DURING Carboplatin / VINCRISTIN
- Progression DURING Carboplatin / VINBLASTIN
- Progression AFTER Therapy
- LENGTH of 1st line treatment
- BEVACIZUMAB
- RADIATION THERAPY
- GENERAL INFORMATIONS

Answering the questionnaire will take 10-15 minutes.  
Thank you for your time.

New page | copy | adjust

Next

## Page: 3 | PROGRESSION\_DURING\_Carbo/VCR

previous

33%

reminder\_patient\_cohort | Title | copy | adjust

All questions below ONLY concern children with Chiasmatic Hypothalamic Glioma (ICHG) DIAGNOSED during the FIRST year of life.

PROGRESSION\_DURING\_CARBOPLATIN/\_V Title copy adjust

## Progression DURING Carboplatin / VINCRISTINE

treatment\_progr.\_DURING\_Carbo\_VCR Multiple Choice Max. 1 copy adjust

1

How do you treat a child progressing during carboplatin / VINCRISTINE chemotherapy?

- (Intensified) CTX (see selection below)
- Targeted monotherapy (e.g. bevacizumab, imatinib) (see selection below)
- Targeted agent like bevacizumab combined with other drug(s)
- Surgery (if safely feasible)
- Surgery (if safely feasible) and continuation of LGG chemotherapy
- Surgery (if safely feasible) and other CTX (see selection below)
- Brachytherapy
- External beam radiotherapy
- Other (specify?)
- Remarks

drugs\_in\_second\_line\_(DURING) Multiple Choice copy adjust

2

Which drug(s) do you actually use in second line (drugs listed below identified by literature review)?

(multiple selections are possible in case you apply a multiple-drug regime)

- |                                                      |                                                |                                           |
|------------------------------------------------------|------------------------------------------------|-------------------------------------------|
| <input type="checkbox"/> Actinomycin                 | <input type="checkbox"/>                       | <input type="checkbox"/> Carboplatin      |
| <input type="checkbox"/> CCNU                        | <input type="checkbox"/> Bevacizumab (Avastin) | <input type="checkbox"/> Cyclophosphamide |
| <input type="checkbox"/> Etoposide                   | <input type="checkbox"/> Cisplatin             | <input type="checkbox"/> Ifosfamide       |
| <input type="checkbox"/> Imatinib mesylate (Gleevec) | <input type="checkbox"/> Everolimus            | <input type="checkbox"/> Irinotecan       |
| <input type="checkbox"/> Procarbazine                | <input type="checkbox"/> Irinotecan            | <input type="checkbox"/> Nilotinib        |
| <input type="checkbox"/> Vinblastin                  | <input type="checkbox"/> Temozolomide          | <input type="checkbox"/> Thioguanine      |
|                                                      | <input type="checkbox"/> Vincristin            | <input type="checkbox"/> Other (specify?) |

Remarks

3rd\_line\_progr.\_DURING\_Carbo\_VCR

Multiple Choice Max. 1

copy

adjust

3

What do you consider as third line therapy if not responsive or early progressive ?

- (Intensified) CTX (see selection below)
- Targeted monotherapy (e.g. bevacizumab, imatinib) (see selection below)
- Targeted agent like bevacizumab combined with other drug(s)
- Surgery (if safely feasible)
- Surgery (if safely feasible) and continuation of LGG chemotherapy
- Surgery (if safely feasible) and other CTX (see selection below)
- Brachytherapy
- External beam radiotherapy
- Other (specify?)
- Remarks

Drugs\_third\_line\_(early\_progr.)

Multiple Choice

copy

adjust

4

Which drug(s) do you use in third line (drugs listed below identified by literature review)?

(multiple selections are possible in case you apply amultiple-drug regime)

- |                                                      |                                                |                                                                |
|------------------------------------------------------|------------------------------------------------|----------------------------------------------------------------|
| <input type="checkbox"/> Actinomycin                 | <input type="checkbox"/>                       | <input type="checkbox"/> Carboplatin                           |
| <input type="checkbox"/> CCNU                        | <input type="checkbox"/> Bevacizumab (Avastin) | <input type="checkbox"/> Cyclophosphamide                      |
| <input type="checkbox"/> Etoposide                   | <input type="checkbox"/> Cisplatin             | <input type="checkbox"/> Ifosfamide                            |
| <input type="checkbox"/> Imatinib mesylate (Gleevec) | <input type="checkbox"/> Everolimus            | <input type="checkbox"/> Irinotecan                            |
| <input type="checkbox"/> Procarbazine                | <input type="checkbox"/> Nilotinib             | <input type="checkbox"/> Thioguanine                           |
| <input type="checkbox"/> Vinblastin                  | <input type="checkbox"/> Temozolomide          | <input type="checkbox"/> Vincristin                            |
|                                                      |                                                | <input type="checkbox"/> Other (specify?) <input type="text"/> |

Remarks

New page

copy

adjust

Next

previous

44%

reminder\_patient\_cohort Title copy adjust

All questions below ONLY concern children with Chiasmatic Hypothalamic Glioma (ICHG) DIAGNOSED during the FIRST year of life.

PROGR\_DURING\_CARBO/\_VBL Title copy adjust

### Progression DURING Carboplatin / VINBLASTIN

treatment\_progr\_DURING\_Carbo\_VBL Multiple Choice Max. 1 copy adjust

5

How do you treat a child progressing during carboplatin / VINBLASTIN chemotherapy?

- (Intensified) CTX (see selection below)
- Targeted monotherapy (e.g. bevacizumab, imatinib) (see selection below)
- Targeted agent like bevacizumab combined with other drug(s)
- Surgery (if safely feasible)
- Surgery (if safely feasible) and continuation of LGG chemotherapy
- Surgery (if safely feasible) and other CTX (see selection below)
- Brachytherapy
- External beam radiotherapy
- Other (specify?)
- Remarks

drugs\_in\_second\_line\_(DURING)\_VBL Multiple Choice copy adjust

6

Which drug(s) do you actually use in second line (drugs listed below identified by

literature review)?

(multiple selections are possible in case you apply a multiple-drug regime)

Actinomycin

CCNU

Etoposide

Imatinib mesylate (Gleevec)

Procarbazine

Vinblastin

Remarks

Bevacizumab (Avastin)

Cisplatin

Everolimus

Irinotecan

Temozolomide

Vincristin

Carboplatin

Cyclophosphamide

Ifosfamide

Nilotinib

Thioguanine

Other (specify?)

3rd\_line\_progr\_DURING\_Carbo\_VBL

Multiple Choice Max. 1

copy

adjust

7

What do you consider as third line therapy if not responsive or early progressive ?

- (Intensified) CTX (see selection below)
- Targeted monotherapy (e.g. bevacizumab, imatinib) (see selection below)
- Targeted agent like bevacizumab combined with other drug(s)
- Surgery (if safely feasible)
- Surgery (if safely feasible) and continuation of LGG chemotherapy
- Surgery (if safely feasible) and other CTX (see selection below)
- Brachytherapy
- External beam radiotherapy
- Other (specify?)
- Remarks

Drugs\_third\_line\_(early\_progr.)\_VBL

Multiple Choice

copy

adjust

8

Which drug(s) do you use in third line (drugs listed below identified by literature review)?

(multiple selections are possible in case you apply a multiple-drug regime)

Actinomycin

CCNU

Etoposide

Imatinib mesylate (Gleevec)

Bevacizumab (Avastin)

Cisplatin

Everolimus

Carboplatin

Cyclophosphamide

Ifosfamide

Nilotinib

Procarbazine

Thioguanine

Remarks

Irinotecan

Vincristin

Temozolomide

Other (specify?)

Vinblastin

New page copy adjust

NEXT

---

## Page: 5 | Progression\_AFTER\_therapy

---

previous

56%

reminder\_patient\_cohort Title copy adjust

**All questions below ONLY concern children with Chiasmatic Hypothalamic Glioma (ICHG) DIAGNOSED during the FIRST year of life.**

Title\_Progression\_after\_ther Title copy adjust

## Progression AFTER therapy

Treatment\_AFTER\_end\_1st\_line\_CTX Multiple Choice Max. 1 copy adjust

9

How do you treat a child progressing AFTER THE END of primary chemotherapy

- Rechallenging to carboplatin / vincristin or carboplatin / vinblastin
- Other CTX (see selection below)
- Targeted monotherapy (e.g. bevacizumab, imatinib) (see selection below)
- Targeted agent like bevacizumab combined with other drug(s)

- Surgery (if safely feasible)
- Surgery (if safely feasible) and continuation of LGG chemotherapy
- Surgery (if safely feasible) and other CTX (see selection below)
- Brachytherapy
- External beam radiotherapy
- Other (specify?)
- Remarks

|                                |                 |      |        |
|--------------------------------|-----------------|------|--------|
| Drugs_progr_after_end_1st_line | Multiple Choice | copy | adjust |
|--------------------------------|-----------------|------|--------|

**10**

Which drug(s) do you use in second line (drugs listed below identified by literature review)?

(multiple selections are possible in case you apply amultiple-drug regime)

|                                                       |                                                |                                                                |
|-------------------------------------------------------|------------------------------------------------|----------------------------------------------------------------|
| <input type="checkbox"/> Actinomycin                  | <input type="checkbox"/>                       | <input type="checkbox"/> Carboplatin                           |
| <input type="checkbox"/> CCNU                         | <input type="checkbox"/> Bevacizumab (Avastin) | <input type="checkbox"/> Cyclophosphamide                      |
| <input type="checkbox"/> Etoposide                    | <input type="checkbox"/> Cisplatin             | <input type="checkbox"/> Ifosfamide                            |
| <input type="checkbox"/> Imatinib mesylate (Gleevec)  | <input type="checkbox"/> Everolimus            | <input type="checkbox"/> Nilotinib                             |
| <input type="checkbox"/> Procarbazine                 | <input type="checkbox"/> Irinotecan            | <input type="checkbox"/> Vincristin                            |
| <input type="checkbox"/> Thioguanine                  | <input type="checkbox"/> Vinblastin            | <input type="checkbox"/> Temozolomide                          |
| <input type="checkbox"/> Remarks <input type="text"/> |                                                | <input type="checkbox"/> Other (specify?) <input type="text"/> |

|          |      |        |
|----------|------|--------|
| New page | copy | adjust |
|----------|------|--------|

**Next**

**previous**

|     |  |
|-----|--|
| 67% |  |
|-----|--|

|                         |       |      |        |
|-------------------------|-------|------|--------|
| reminder_patient_cohort | Title | copy | adjust |
|-------------------------|-------|------|--------|



All questions below ONLY concern children with Chiasmatic Hypothalamic Glioma (ICHG) DIAGNOSED during the FIRST year of life.

|                     |       |      |        |
|---------------------|-------|------|--------|
| LENGTH_of_treatment | Title | copy | adjust |
|---------------------|-------|------|--------|

## LENGTH of first line treatment

|                     |                        |      |        |
|---------------------|------------------------|------|--------|
| LENGTH_of_treatment | Multiple Choice Max. 1 | copy | adjust |
|---------------------|------------------------|------|--------|

11

How long do you treat in first line?

- 12 months
- 18 months
- other

|                             |           |      |        |
|-----------------------------|-----------|------|--------|
| duration_1st_line_Carbo_VCR | Drop down | copy | adjust |
|-----------------------------|-----------|------|--------|

12

In case of carboplatin / vincristine (e.g. SIOP LGG 2004): do you presently stop after 18 months or add a prolonged maintenance?

:: Please choose :: ▼

|                                 |           |      |        |
|---------------------------------|-----------|------|--------|
| contiuring_Carbo_VCR_prolongued | Drop down | copy | adjust |
|---------------------------------|-----------|------|--------|

13

If you prolong 1st line Carbo / VCR, do you add more Carbo / VCR cycles?

:: Please choose :: ▼

|                                    |                 |      |        |
|------------------------------------|-----------------|------|--------|
| Drugs_prolonged_maintenance_actual | Multiple Choice | copy | adjust |
|------------------------------------|-----------------|------|--------|

14

If you give other drugs, please specify

(multiple selections are possible in case you apply amultiple-drug regime)

- Actinomycin   Carboplatin

|                                                      |                                                                               |
|------------------------------------------------------|-------------------------------------------------------------------------------|
| <input type="checkbox"/> CCNU                        | <input type="checkbox"/> Bevacizumab (Avastin)                                |
| <input type="checkbox"/> Etoposide                   | <input type="checkbox"/> Cisplatin <input type="checkbox"/> Cyclophosphamide  |
| <input type="checkbox"/> Imatinib mesylate (Gleevec) | <input type="checkbox"/> Everolimus <input type="checkbox"/> Ifosfamide       |
| <input type="checkbox"/> Procarbazine                | <input type="checkbox"/> Irinotecan <input type="checkbox"/> Nilotinib        |
| <input type="checkbox"/> Thioguanine                 | <input type="checkbox"/> Vincristin <input type="checkbox"/> Temozolomide     |
| <input type="checkbox"/> Remarks                     | <input type="checkbox"/> Vinblastin <input type="checkbox"/> Other (specify?) |
| <input type="text"/>                                 | <input type="text"/>                                                          |

|                                |           |      |        |
|--------------------------------|-----------|------|--------|
| consider_prolonged_maintenance | Drop down | copy | adjust |
|--------------------------------|-----------|------|--------|

**15**

Would you consider prolonged maintenance of first line therapy?

|                                      |                 |      |        |
|--------------------------------------|-----------------|------|--------|
| Drugs_prolonged_maintenance_consider | Multiple Choice | copy | adjust |
|--------------------------------------|-----------------|------|--------|

**16**

If so: which therapy?

(multiple selections are possible in case you apply a multiple-drug regime)

|                                                      |                                                |                                           |
|------------------------------------------------------|------------------------------------------------|-------------------------------------------|
| <input type="checkbox"/> Actinomycin                 | <input type="checkbox"/> Bevacizumab (Avastin) | <input type="checkbox"/> Carboplatin      |
| <input type="checkbox"/> CCNU                        | <input type="checkbox"/> Cisplatin             | <input type="checkbox"/> Cyclophosphamide |
| <input type="checkbox"/> Etoposide                   | <input type="checkbox"/> Everolimus            | <input type="checkbox"/> Ifosfamide       |
| <input type="checkbox"/> Imatinib mesylate (Gleevec) | <input type="checkbox"/> Irinotecan            | <input type="checkbox"/> Nilotinib        |
| <input type="checkbox"/> Procarbazine                | <input type="checkbox"/> Temozolomide          | <input type="checkbox"/> Thioguanine      |
| <input type="checkbox"/> Vinblastin                  | <input type="checkbox"/> Vincristin            | <input type="checkbox"/> Other (specify?) |
| <input type="checkbox"/> Remarks                     | <input type="text"/>                           |                                           |
| <input type="text"/>                                 |                                                |                                           |

|          |      |        |
|----------|------|--------|
| New page | copy | adjust |
|----------|------|--------|

**Next**

previous

78%

Title\_Use\_of\_BVZ Title copy adjust

## Use of Bevacizumab in children with chiasmatic hypothalamic glioma

BVZ\_availability Drop down copy adjust

17

Was bevacizumab available to you in the past for treatment of children with chiasmatic / hypothalamic glioma?

:: Please choose :: ▼

Experience\_with\_BVZ\_in\_infant\_OPG Drop down copy adjust

18

Do you have experience in the use of BVZ in children with chiasmatic / hypothalamic glioma?

:: Please choose :: ▼

How\_many\_treated\_BVZ Multiple Choice Max. 1 copy adjust

19

If yes, how many were treated at your centre?

- Not applicable
- 1
- 2 to 5
- 6 to 10
- 11 to 15
- more than 15 (how many?)

Percentage\_response\_BVZ

Multiple Choice Max. 1

copy

adjust

20

If yes, how many responded with stable disease or regression?

- Not applicable
- 0 to 20 %
- 20 to 40 %
- 40 to 60 %
- more than 60 %
- specify if possible

How\_many\_BVZ\_under\_1

Multiple Choice Max. 1

copy

adjust

21

If yes, how many were below one year of age?

- Not applicable
- 1
- 2 to 5
- 6 to 10
- 11 to 15
- more than 15 (how many?)

BVZ\_duration

Drop down

copy

adjust

22

How long do you usually treat children with CHG using Bevacizumab?

 ▼

Combination\_BVZ

Multiple Choice Max. 1

copy

adjust

23

Was BVZ combined with another drug? if yes, specify.

- No
- Yes

BVZ\_complications Multiple Choice copy adjust

24

Where there major complications using BVZ in these children?

- No
- Yes (please specify)

Future\_availability\_BVZ Multiple Choice Max. 1 copy adjust

25

Would BVZ be available to you in the future for treatment of young children with OPG (outside of a treatment protocol with bevacizumab provided)?

- No
- Yes (please specify)

New page copy adjust

Next

Page: 8 | RTX

previous

89%

reminder\_patient\_cohort Title copy adjust

All questions below ONLY concern children with Chiasmatic Hypothalamic Glioma (ICHG) DIAGNOSED during the FIRST year of life.

title\_RTX Title copy adjust

## Radiation therapy

|                    |       |      |        |
|--------------------|-------|------|--------|
| title_external_RTX | Title | copy | adjust |
|--------------------|-------|------|--------|

## External radiation therapy

|         |           |      |        |
|---------|-----------|------|--------|
| Age_RTX | Drop down | copy | adjust |
|---------|-----------|------|--------|

26

Above which age (in years) do you consider applying external beam radiotherapy?  
(answer in years)

:: Please choose :: ▼

|                 |                     |      |        |
|-----------------|---------------------|------|--------|
| indications_RTX | Multiple Text Lines | copy | adjust |
|-----------------|---------------------|------|--------|

27

What do you consider as indications to apply external beam radiotherapy?

1

2

3

4

5

|                       |                     |      |        |
|-----------------------|---------------------|------|--------|
| contraindications_RTX | Multiple Text Lines | copy | adjust |
|-----------------------|---------------------|------|--------|

28

What do you consider the most important contra-indications to external beam radiotherapy, i.e. which lead to withholding it?

1

2

3

4

5

|                  |       |      |        |
|------------------|-------|------|--------|
| title_brachyther | Title | copy | adjust |
|------------------|-------|------|--------|

# Brachytherapy

brachytherapy\_option\_y-n Drop down copy adjust

29

Do you consider brachytherapy as an option?

brachyther\_avail Drop down copy adjust

30

Is it available for your patients?

brachyther\_indic Multiple Text Lines copy adjust

31

15.2. If Brachytherapy is available: What are the indication to perform brachytherapy?

|   |                      |
|---|----------------------|
| 1 | <input type="text"/> |
| 2 | <input type="text"/> |
| 3 | <input type="text"/> |
| 4 | <input type="text"/> |
| 5 | <input type="text"/> |

New page copy adjust

Next

previous

100%

TITLE\_General\_issues Title copy adjust

## General issues

country Multiple Text Lines copy adjust

32

Country / Oncologic centre

Country

Oncologic centre (place of work)

brain\_tu\_pts\_per\_year Multiple Choice copy adjust

33

Please indicate the number of new brain tumour patients at your centre per year?

- less than 5
- 5 to 10
- 10 to 20
- 20 to 30
- 30 to 40
- more than 40

Nr\_patients\_OPG\_per\_yr Multiple Choice copy adjust

34

How many new patients with optic pathway glioma are seen at your centre per year?

- none
- 1 to 3
- 4 to 6
- 7 to 10
- 10 to 15
- more than 15



Nr\_infants\_OPG\_5\_yrs Multiple Choice copy adjust

35

How many infants with OPG present in five years

- less than 1
- 1
- 2 to 3
- 4 to 6
- 7 to 8
- more than 8
- comments

personal\_information Title copy adjust

## Personal information

profession Multiple Choice Max. 1 copy adjust

36

Profession

- Paediatric oncologist
- Neurosurgeon
- Radiotherapist
- Other

EXPERIENCE Drop down copy adjust

37

Years of experience

Personal\_information Multiple Text Lines copy adjust

38

Please enter personal details below (optional)

Name

email

Open\_comments | Essay / text area | copy | adjust

39

If there are issues that have not been raised, please enter your comments:

Submit | Submit button | copy | adjust

Submit

---

## Final text

---

x | Final Text | copy | adjust

Thank you very much for answering the questionnaire!

Please send us your feedback, comments and remarks

---

[About Us](#) | [Privacy](#) | [Terms & Conditions](#)

---

Spam prevention 1 + 4 =

[send feedback](#)

---

14/04/2016 © ThesisTools.de Developed by: Joan van Rixtel Designed by: Marketinge PHP Framework: Symfony2 Thanks to: Coen Dörge, Ulrike Grafberger
